# Supplementary material
Source: MDPI journal article supplement (https://www.mdpi.com/2072-4292/14/12/2920)
Supplement: s1 [file s1]

## SUPPLEMENTARY MATERIAL

**Table S1. Sources used to calculate carbon emission factors from charcoal and pole production.** The table presents direct and indirect activities related to each production and is subdivided by type of source (distance calculation, standard emissions, among others). Considering that sources were selected according to the type of information available for our research.

| TYPE OF ACTIVITY | ACTIVITY         |                                   | TYPE OF SOURCE                                        | SOURCE                          |
|------------------|------------------|-----------------------------------|-------------------------------------------------------|---------------------------------|
| DIRECT           | Tree cutting     | Chainsaw                          | Brand models and Emission Factors                     | Husqvarna website [1]           |
|                  | Boat driving     | Log transport by small boat       | Brand models                                          | Yanmar website [2]              |
|                  |                  |                                   | Distance (charcoal factory – coupe)                   | Google Earth                    |
|                  | Fire monitoring  | Kiln                              | Emission values                                       | Lacaux <i>et al.</i> [3]        |
|                  |                  |                                   |                                                       | Pennise <i>et al.</i> [4]       |
|                  |                  |                                   |                                                       | Bailis <i>et al.</i> [5]        |
|                  | Lorry driving    | Charcoal transport by truck       | Standard emissions                                    | Gencat [6]                      |
|                  |                  |                                   | Distance (charcoal factory – company – port terminal) | Distance calculator website [7] |
|                  | Exportation      | Charcoal transport by Cargo ship  | Container terminals location                          | SeaRates website [8]            |
|                  |                  |                                   | Standard emissions                                    | OOCL website [9]                |
|                  |                  |                                   |                                                       | Cefic [10]                      |
|                  |                  |                                   | Distance                                              | Sea Rates website [8]           |
|                  |                  |                                   |                                                       | Sea- distance website [11]      |
| INDIRECT         | Boat driving     | Tree cutters transport            | Brand models                                          | Yanmar website [2]              |
|                  |                  |                                   | Distance (charcoal factory – coupe)                   | Google Earth                    |
|                  | Moped            | Workers and contractors transport | Standard emission                                     | Gencat [6]                      |
|                  |                  |                                   | Distance (registered residence – charcoal factory)    | Distance calculator website [7] |
|                  | Car              | Workers and contractors transport | Standard emissions                                    | Gencat [6]                      |
|                  |                  |                                   | Distance (registered residence – charcoal factory)    | Distance calculator website [7] |
|                  | Charcoal burning | Barbecue                          | Emission values                                       | Huang <i>et al.</i> [12]        |

**Table S2 Parameters taken into account to estimate carbon emission per contractor for each type of production.** (Arifin and Mustafa [13]).

| TYPE OF CONTRACTOR | LICENSE (days) | WORKERS | ASSIGNED AREA (ha) | YIELD GREENWOOD (t.ha <sup>-1</sup> ) |
|--------------------|----------------|---------|--------------------|---------------------------------------|
| CHARCOAL           | 365            | 22.5    | 2.2                | 396                                   |
| POLE               | 182.5          | 13.5    | 22.3               | -                                     |

**Table S3 Emission factors for the Husqvarna chainsaws models.** All models are for professional use and sold in Japan. Adapted from. Husqvarna website [1]

| EXHAUST EMISSIONS AVERAGE (g.kWh) |                             |       |        |        |        |                 |                      |        |
|-----------------------------------|-----------------------------|-------|--------|--------|--------|-----------------|----------------------|--------|
| MODEL                             | CILINDER (cm <sup>3</sup> ) | CLASS | CO     | C (CO) | HC     | CO <sub>2</sub> | C (CO <sub>2</sub> ) | TOTAL  |
| 576 XP                            | 73.5                        | SH:3  | 313.00 | 134.33 | 65.50  | 853.00          | 232.43               | 366.76 |
| 560 XP                            | 59.8                        | SH:3  | 241.00 | 103.43 | 56.00  | 802.00          | 218.53               | 321.96 |
| 550 XP                            | 50.1                        | SH:3  | 271.00 | 116.31 | 57.00  | 837.00          | 228.07               | 344.37 |
| 395 XP                            | 93.6                        | SH:3  | 390.50 | 167.60 | 125.00 | 731.50          | 199.32               | 366.92 |
| <i>Mean</i>                       |                             |       | 303.88 | 130.41 |        | 805.88          | 219.58               | 350.00 |
| <i>Median</i>                     |                             |       | 292.00 | 125.32 |        | 819.50          | 223.30               | 355.57 |

\* SH:3 Corresponds to level for non-road mobile exhaust emissions, with a larger displacement of 50 cc.

\* Values for carbon monoxide (CO) and carbon dioxide (CO<sub>2</sub>) were converted to Carbon values using 2.33 and 3.67 conversion factors, respectively.

\* As for hydrocarbons (HC) are showed as an average and not values are specified we did not take into account it.

**Table S4**      **Emission factors for the logging boats.** Adapted from: Yanmar official website [2].

| BOAT TYPE              | MODEL   | RATED<br>OUTPUT<br>(mph) | RATED<br>OUTPUT<br>(kW) | (Km.kW-<br>hr <sup>-1</sup> ) | EXHAUST EMISSION (g/kWh) |      |      |        |
|------------------------|---------|--------------------------|-------------------------|-------------------------------|--------------------------|------|------|--------|
|                        |         |                          |                         |                               | min                      | max  | mean | median |
| Sailboat + small craft | 1GM10   | 9                        | 6.6                     | 2.19                          | 0.98                     | 1.29 | 1.16 | 1.18   |
| Sailboat + small craft | 2YM15   | 13.6                     | 10                      | 2.19                          | 0.98                     | 1.29 | 1.16 | 1.19   |
| Sailboat + small craft | 3YM20   | 21                       | 15                      | 2.25                          | 0.95                     | 1.26 | 1.13 | 1.15   |
| Sailboat + small craft | 3YM30AE | 29.1                     | 21.3                    | 2.20                          | 0.98                     | 1.29 | 1.16 | 1.18   |
| Sailboat + small craft | 3JH5E   | 39                       | 28.7                    | 2.19                          | 0.98                     | 1.30 | 1.16 | 1.19   |
| Sailboat + small craft | 4JH45   | 45                       | 33                      | 2.19                          | 0.98                     | 1.29 | 1.16 | 1.18   |
| Sailboat + small craft | 4JH5E   | 54                       | 40                      | 2.17                          | 0.99                     | 1.30 | 1.17 | 1.20   |

|                        |           |     |      |      |      |      |      |      |
|------------------------|-----------|-----|------|------|------|------|------|------|
| Sailboat + small craft | 4JH57     | 57  | 42   | 2.18 | 0.98 | 1.30 | 1.16 | 1.19 |
| Sailboat + small craft | 4JH4-TE   | 75  | 55.2 | 2.19 | 0.98 | 1.30 | 1.16 | 1.19 |
| Sailboat + small craft | 4JH80     | 80  | 59   | 2.18 | 0.98 | 1.30 | 1.17 | 1.19 |
| Sailboat + small craft | 4JH110    | 110 | 81   | 2.19 | 0.98 | 1.30 | 1.16 | 1.19 |
| Sailboat + small craft | 4JH4-HTE  | 110 | 81   | 2.19 | 0.98 | 1.30 | 1.16 | 1.19 |
| Sailboat + small craft | 4JH3-DTE  | 125 | 92   | 2.19 | 0.98 | 1.30 | 1.16 | 1.19 |
| Powerboat engines      | 4LHA-HTTP | 160 | 118  | 2.18 | 0.98 | 1.30 | 1.17 | 1.19 |
| Powerboat engines      | 4LHA-DTP  | 200 | 147  | 2.19 | 0.98 | 1.29 | 1.16 | 1.19 |
| Powerboat engines      | ALHA-STP  | 240 | 177  | 2.18 | 0.98 | 1.30 | 1.17 | 1.19 |
| Powerboat engines      | 6LPA-STP2 | 315 | 232  | 2.19 | 0.98 | 1.30 | 1.16 | 1.19 |
| Powerboat engines      | 8LV-320   | 320 | 235  | 2.19 | 0.98 | 1.29 | 1.16 | 1.18 |
| Powerboat engines      | 8LV-350   | 350 | 257  | 2.19 | 0.98 | 1.29 | 1.16 | 1.18 |
| Powerboat engines      | 6LY2A-UTP | 370 | 272  | 2.19 | 0.98 | 1.29 | 1.16 | 1.19 |
| Powerboat engines      | 8LV-370   | 370 | 272  | 2.19 | 0.98 | 1.29 | 1.16 | 1.19 |
| Powerboat engines      | 6LY3-UTP  | 380 | 279  | 2.19 | 0.98 | 1.29 | 1.16 | 1.18 |
| Powerboat engines      | 6LY400    | 400 | 294  | 2.19 | 0.98 | 1.29 | 1.16 | 1.19 |
| Powerboat engines      | 6LY2A-STP | 440 | 324  | 2.19 | 0.98 | 1.30 | 1.16 | 1.19 |
| Powerboat engines      | 6LY3-STP  | 440 | 324  | 2.19 | 0.98 | 1.30 | 1.16 | 1.19 |
| Powerboat engines      | 6LY440    | 440 | 324  |      | 0.98 | 1.30 | 1.16 | 1.19 |
| Powerboat engines      | 6LY3-ETP  | 480 | 353  |      | 0.98 | 1.29 | 1.16 | 1.19 |
| <b>Mean</b>            |           |     |      |      |      |      |      | 1.16 |
| <b>Median</b>          |           |     |      |      |      |      |      | 1.17 |

**Table S5 Distance (km) from the respective Charcoal Factory to the coupes available for Felling.**  
Adapted from Arifin and Mustafa [13].

| RANGE                            | COMP. NUMBER | DISTANCE (km) |                      |
|----------------------------------|--------------|---------------|----------------------|
|                                  |              | FINAL FELLING | INTERMEDIATE FELLING |
| KUALA SEPETANG<br>(NORTH +SOUTH) | 1            | 34.87         | 34.87                |
|                                  | 2            | 25.72         | 25.72                |
|                                  | 3            | 22.58         | 22.58                |
|                                  | 4            | 27.63         | 27.63                |
|                                  | 5            | 21.5          | 21.5                 |
|                                  | 6            | 16.9          | 16.9                 |
|                                  | 10           | 24.42         | 24.42                |
|                                  | 14           | 9.56          | 9.56                 |
|                                  | 19           | 2.61          | -                    |
|                                  | 20           | 5.23          | -                    |
|                                  | 21           | 8.2           | -                    |
|                                  | 22           | 10.72         | 10.72                |
|                                  | 23           | 13.77         | 13.77                |
|                                  | 24           | 15.33         | 15.33                |
|                                  | 25           | 21.36         | 21.36                |

|                      |     |       |       |
|----------------------|-----|-------|-------|
|                      | 27  | 6.92  | -     |
|                      | 28  | 3.59  | -     |
|                      | 30  | 2.37  | 2.37  |
|                      | 31  | 2.93  | -     |
|                      | 32  | 5.67  | -     |
|                      | 33  | 10.58 | -     |
|                      | 36  | 12.37 | 12.37 |
|                      | 37  | 8.29  | -     |
|                      | 38  | 7.79  | 7.79  |
|                      | 39  | 7.1   | 7.1   |
|                      | 41  | 10.67 | -     |
|                      | 46  | 10.63 | -     |
|                      | 47  | -     | -     |
|                      | 48  | 8.53  | 8.53  |
|                      | 49  | 6.25  | 6.25  |
| <b>Mean</b>          |     | 12.02 | 11.46 |
| <b>Median</b>        |     | 10.07 | 10.12 |
| <b>KUALA TRONG</b>   | 51  | 10.13 | 10.13 |
|                      | 52  | 6.94  | 6.94  |
|                      | 53  | 8.37  | 8.37  |
|                      | 54  | 6.83  | -     |
|                      | 55  | 3.13  | 3.13  |
|                      | 56  | 6.91  | 6.91  |
|                      | 57  | 8.87  | 8.87  |
|                      | 58  | 9.83  | 9.83  |
|                      | 59  | 11.68 | -     |
|                      | 65  | 16.94 | -     |
|                      | 66  | 18.61 | -     |
|                      | 67  | 15.67 | 15.67 |
|                      | 68  | 15.67 | 15.67 |
|                      | 69  | 5.16  | -     |
|                      | 70  | 16.1  | -     |
|                      | 71  | 5.38  | -     |
|                      | 72  | 6.13  | 6.13  |
|                      | 73  | 8.4   | -     |
|                      | 74  | 13.52 | -     |
|                      | 75  | 15.9  | -     |
|                      | 76  | 13.24 | -     |
|                      | 77  | 14.87 | 14.87 |
|                      | 78  | 15.78 | -     |
|                      | 79  | 13.59 | -     |
|                      | 82  | 10.54 | -     |
|                      | 83  | 6.39  | 6.39  |
|                      | 84  | 13.35 | -     |
|                      | 85  | 9.3   | -     |
|                      | 86  | 8.84  | 8.84  |
| <b>Mean</b>          |     | 10.73 | 10.97 |
| <b>Median</b>        |     | 9.98  | 10.54 |
| <b>SUNGAI KERANG</b> | 89  | 9.49  | 9.49  |
|                      | 90  | 10.34 | 10.34 |
|                      | 92  | 5.95  | 5.95  |
|                      | 93  | 5.66  | 5.66  |
|                      | 94  | 9.16  | 9.16  |
|                      | 95  | 12.35 | 12.35 |
|                      | 98  | 9.52  | -     |
|                      | 99  | 8.06  | 8.06  |
|                      | 100 | 4.22  | -     |
|                      | 101 | 4.88  | 4.88  |
|                      | 102 | 3.1   | 3.1   |
|                      | 104 | 3.78  | 3.78  |
|                      | 105 | 6.37  | 6.37  |
|                      | 106 | 7.59  | 7.59  |
|                      | 107 | 9.13  | 9.13  |

|               |     |       |       |
|---------------|-----|-------|-------|
|               | 108 | 11.58 | 11.58 |
| <b>Mean</b>   |     | 7.67  | 8.17  |
| <b>Median</b> |     | 8.06  | 8.44  |

\* Distance calculation using Google Earth's ♥ measure tool.

**Table S6 Emission factors, grams of pollutant per kilogram charcoal produced in kiln.** Adapted from: Lacaux *et al.* [3]; Pennise *et al.* [4].

| EMISSION FACTORS, g OF POLLUTANT PER kg OF CHARCOAL PRODUCED |                 |                      |     |        |                 |                     |                      |                  |                     |                      |               |
|--------------------------------------------------------------|-----------------|----------------------|-----|--------|-----------------|---------------------|----------------------|------------------|---------------------|----------------------|---------------|
| SOURCE                                                       | CO <sub>2</sub> | C (CO <sub>2</sub> ) | CO  | C (CO) | CH <sub>4</sub> | CO <sub>2</sub> eq. | C (CH <sub>4</sub> ) | N <sub>2</sub> O | CO <sub>2</sub> eq. | C (CO <sub>2</sub> ) | TOTAL         |
| Pennise <i>et al.</i> , 2001                                 | 1382            | 376.57               | 324 | 139.06 | 47.6            | 999.6               | 272.37               | 0.03             | 8.68                | 2.37                 | <b>842.24</b> |
| Lacaux <i>et al.</i> , 1994                                  | -               | 420                  | -   | 100    | -               | -                   | 30                   | -                | -                   | 5.91                 | <b>561.83</b> |
| <b>Mean</b>                                                  |                 |                      |     |        |                 |                     |                      |                  |                     |                      | <b>702.03</b> |
| <b>Median</b>                                                |                 |                      |     |        |                 |                     |                      |                  |                     |                      | <b>702.03</b> |

\* NO<sub>2</sub> values have been converted to CO<sub>2</sub> equivalents (conversion factor 310) and convert to Carbon values using 3.67 as conversion value (IPCC, 2007).

\* Only highlighted values were taken into account for our Carbon emission estimations.

**Table S7 Emission factors for heavy truck transport (g.km<sup>-1</sup>).** Adapted from: Gencat, 2017. [6]

|         |        |             |           | EMISSIONS g.km-h <sup>-1</sup> |                      |                 |                      |                 |                      |
|---------|--------|-------------|-----------|--------------------------------|----------------------|-----------------|----------------------|-----------------|----------------------|
|         |        |             |           | 21Km/h                         |                      | 69Km/h          |                      | 102Km/h         |                      |
| VEHICLE | FUEL   | TYPE        | WEIGHT(t) | CO <sub>2</sub>                | C (CO <sub>2</sub> ) | CO <sub>2</sub> | C (CO <sub>2</sub> ) | CO <sub>2</sub> | C (CO <sub>2</sub> ) |
| HEAVY   | DIESEL | RIGID       | <= 14     | 755.55                         | 205.87               | 377.6           | 102.89               | 397.18          | 108.22               |
|         |        |             | > 14      | 156.72                         | 425.54               | 458.7           | 124.99               | 452.12          | 123.19               |
|         |        | ARTICULATED | <= 34     | 1422.68                        | 387.65               | 535.61          | 145.94               | 505.16          | 137.65               |
|         |        |             | > 34      | 2057.35                        | 560.59               | 618.83          | 168.62               | 562.4           | 153.24               |
| Mean    |        |             |           | 220.4                          |                      |                 |                      |                 |                      |
| Median  |        |             |           | 149.6                          |                      |                 |                      |                 |                      |

\* Since velocity (km/h) values for truck transport are not specified in any source, this study will use average values to estimate a range of exhaust emissions.

**Table S8 Distance (km) from the charcoal factories to the Companies in charge of the charcoal exportation.** Adapted from: Distance Calculator [7].

| CHARCOAL FACTORY | COMPANY LOCATION | DISTANCE (km) |
|------------------|------------------|---------------|
| KUALA SEPETANG   | TAIPING          | 17            |
|                  | KUALA KANGSAR    | 43            |
| KUALA TRONG      | TAIPING          | 20            |
|                  | KUALA KANGSAR    | 38            |
| SUNGAI KERANG    | TAIPING          | 35            |

| KUALA KANGSAR |  | * 52  |
|---------------|--|-------|
| Mean          |  | 34.17 |
| Median        |  | 36.50 |

**Table S9 Distance (km) from the Companies to the Port terminals in Malaysia for charcoal exportation.** Adapted from: Distance Calculator [7].

| COMPANY LOCATION | PORT TERMINAL | DISTANCE (km) |
|------------------|---------------|---------------|
| TAIPING          | PORT KLANG    | 287           |
|                  | PENANG        | 98            |
| KUALA KANGSAR    | PORT KLANG    | 261           |
|                  | PENANG        | 127           |
| Mean             |               | 193.25        |
| Median           |               | 194.00        |

**Table S10 Distance (km) from the charcoal factories to the registered workers' residence.** Adapted from: Distance Calculator [7].

| REGISTERED RESIDENCE   | DISTANCE (km)      |             |               |
|------------------------|--------------------|-------------|---------------|
|                        | CHARCOAL FACTORIES |             |               |
|                        | KUALA SEPETANG     | KUALA TRONG | SUNGAI KERANG |
| Taiping, Perak         | 16                 | 20          | 35            |
| Matang, Perak          | 8                  | 18          | 33            |
| Changkat Jering, Perak | 15                 | 11          | 26            |
| Kuala Kurau, Perak     | 50                 | 62          | 77            |
| Trong, Perak           | 21                 | -           | 16            |
| Kuala Sepetang, Perak  | -                  | 24          | 38            |
| Bukit Gantang, Perak   | 22                 | 13          | 27            |
| Semanggol, Perak       | 27                 | 40          | 54            |
| Kuala Kangsar, Perak   | 44                 | 39          | 54            |
| Sg. Kerang, Perak      | 38                 | 15          | -             |
| Pantai Remis, Perak    | 54                 | 32          | 18            |
| Ayer Tawar, Perak      | 81                 | 62          | 51            |
| Mean                   |                    |             | 34.57         |
| Median                 |                    |             | 32            |

**Table S11 Estimates of exhaust emission factors for cargo ships (g/ tonne-km).** Adapted from: Buhaug *et al.* [14]; Mc Kinnon and Piecyk [15].

| TYPE             |                                    | CAPACITY (t) | EMISSIONS g.tonne-km <sup>-1</sup> |                      |
|------------------|------------------------------------|--------------|------------------------------------|----------------------|
|                  |                                    |              | CO <sub>2</sub>                    | C (CO <sub>2</sub> ) |
| BULK SHIPS       | Small tanker                       | 844          | 20                                 | 5.45                 |
|                  | Large tanker                       | 1 8371       | 5                                  | 1.36                 |
|                  | Deep-sea tanker                    | 120 000      | 5                                  | 1.36                 |
|                  | Small bulk vessel                  | 1 720        | 11                                 | 3.00                 |
|                  | Large bulk vessel                  | 14 201       | 7                                  | 1.91                 |
| CONTAINER VESSEL | Small container vessel             | 2 500        | 13.5                               | 3.68                 |
|                  | Larger container vessel            | 20 000       | 11.5                               | 3.13                 |
|                  | Average deep sea container vessel* | -            | 8.4                                | 2.29                 |
| GENERAL CARGO    | 10.000 +dwt                        | -            | 11.9                               | 3.24                 |
|                  | 5.000 - 9.999 dwt                  | -            | 15.8                               | 4.31                 |
|                  | 0-4.999 dwt                        | -            | 13.9                               | 3.79                 |
|                  | 10.000 +dwt, 100 +TEU              | -            | 11                                 | 3.00                 |
|                  | 5.000 - 9.999 dwt, 100 + TEU       | -            | 17.5                               | 4.77                 |
|                  | 0-4.999 dwt, 100 +TEU              | -            | 19.8                               | 5.40                 |
| CONTAINER        | 8.000 + TEU                        | -            | 12.5                               | 3.41                 |
|                  | 5.000 - 7.999 TEU                  | -            | 16.6                               | 4.52                 |
|                  | 3.000 - 4.999 TEU                  | -            | 16.6                               | 4.52                 |
|                  | 2.000 - 2.999 TEU                  | -            | 20.0                               | 5.45                 |
|                  | 1.000 - 1.999 TEU                  | -            | 32.1                               | 8.75                 |

|            |   |      |      |
|------------|---|------|------|
| 0- 999 TEU | - | 36.3 | 9.89 |
| Mean       |   |      | 4.16 |
| Median     |   |      | 3.73 |

**Table S12 Distance from Malaysia port terminals (Port Klang and Penang) to Japanese terminals for charcoal exportation.** Adapted from: SeaRates [8].

| CONTAINER TERMINAL |           |               |
|--------------------|-----------|---------------|
| MALAYSIA           | JAPAN     | DISTANCE (km) |
| Port Klang         | Tokyo     | 5752.48       |
|                    | Hakata    | 4970.41       |
|                    | Tokuyama  | 5122.90       |
|                    | Hiroshima | 5122.90       |
|                    | Mizushima | 5311.54       |
|                    | Kobe      | 5356.97       |
|                    | Osaka     | 5372.70       |
|                    | Yokkaichi | 5372.70       |
|                    | Nagoya    | 5534.50       |
|                    | Shimizu   | 5613.73       |
|                    | Yokohama  | 5732.92       |
|                    | Kawasaki  | 5739.76       |
|                    | Chiba     | 5754.29       |
|                    | Niigata   | 5916.63       |
| Penang             | Tokyo     | 6037.84       |
|                    | Hakata    | 5255.77       |
|                    | Tokuyama  | 5408.26       |
|                    | Hiroshima | 5515.26       |
|                    | Mizushima | 5596.90       |
|                    | Kobe      | 5642.33       |
|                    | Osaka     | 5658.06       |
|                    | Yokkaichi | 5810.00       |
|                    | Nagoya    | 5819.85       |
|                    | Shimizu   | 5899.08       |
|                    | Yokohama  | 6018.27       |
|                    | Kawasaki  | 6025.11       |
|                    | Chiba     | 6039.64       |
|                    | Niigata   | 6201.99       |

|               |         |
|---------------|---------|
| <i>Mean</i>   | 5635.07 |
| <i>Median</i> | 5658.06 |

**Table S13 Car Standard Emissions (g/km).** Adapted from: Gencat [6]

| FUEL          | ENGINE SIZE (cc) | EMISSIONS g.km <sup>-1</sup> |                      |                 |                      |                 |                      |
|---------------|------------------|------------------------------|----------------------|-----------------|----------------------|-----------------|----------------------|
|               |                  | 21KM/H                       |                      | 69KM/H          |                      | 102KM/H         |                      |
|               |                  | CO <sub>2</sub>              | C (CO <sub>2</sub> ) | CO <sub>2</sub> | C (CO <sub>2</sub> ) | CO <sub>2</sub> | C (CO <sub>2</sub> ) |
| GASOLINE      | < 0,8            | 158.18                       | 43.10                | 108.74          | 29.63                | 129.33          | 35.24                |
|               | 0.8 – 1.4        | 193.33                       | 52.68                | 124.26          | 33.86                | 137.60          | 37.49                |
|               | 1.4 – 2.0        | 232.85                       | 63.45                | 145.96          | 39.77                | 154.68          | 42.15                |
|               | > 2.0            | 316.49                       | 86.24                | 182.69          | 49.78                | 192.13          | 52.35                |
| DIESEL        | < 1.4            | 118                          | 32.15                | 97.07           | 26.45                | 112.14          | 30.56                |
|               | 1.4 – 2.0        | 203                          | 55.31                | 129.32          | 35.24                | 145.39          | 39.62                |
|               | > 2.0            | 255.59                       | 69.64                | 165.15          | 45.00                | 187.78          | 51.17                |
| HYBRID        | any              | 97.32                        | 26.52                | 93.66           | 25.52                | 114.63          | 31.23                |
| GLP           | any              | 164.95                       | 44.95                | 127.38          | 34.71                | 155.93          | 42.49                |
| <i>Mean</i>   |                  |                              |                      |                 |                      |                 |                      |
| <i>Median</i> |                  |                              |                      |                 |                      |                 |                      |

\* Since velocity (km/h) values for truck transport are not specified in any source, this study will use average values to estimate a range of exhaust emissions.

**Table S14 Moped Standard Emissions (gC.km<sup>-1</sup>).** Adapted from: Gencat [6]

| TYPE          | CLASSIFICATION    | EMISSIONS (g.km <sup>-1</sup> ) |                      |
|---------------|-------------------|---------------------------------|----------------------|
|               |                   | URBAN (25km/h)                  |                      |
|               |                   | CO <sub>2</sub>                 | C (CO <sub>2</sub> ) |
| Moped         | Conventional      | 73.45                           | 20.01                |
|               | Median class Euro | 58.76                           | 16.01                |
| <i>Mean</i>   |                   | 18.01                           |                      |
| <i>Median</i> |                   | 18.01                           |                      |

**Table S15 Distance in km from the charcoal factory to the places where pole are sold.** Adapted from: Distance Calculator [7].

| Start Location               | End Location | Distance (km) |
|------------------------------|--------------|---------------|
| KUALA SEPETANG               | Kuala Lumpur | 275           |
|                              | Ipoh         | 73            |
|                              | Taiping      | 17            |
|                              | Selangor     | 277           |
|                              | Jonor        | 75            |
|                              | Kelantan     | 343           |
|                              | Penang       | 100           |
| KUALA TRONG (KAMPONG TERONG) | Kuala Lumpur | 272           |
|                              | Ipoh         | 70            |
|                              | Taiping      | 22            |
|                              | Selangor     | 274           |
|                              | Honor        | 72            |
|                              | Kelantan     | 339           |
|                              | Penang       | 113           |
| SUNGAI KERANG                | Kuala Lumpur | 278           |
|                              | Ipoh         | 82            |
|                              | Taiping      | 35            |
|                              | Selangor     | 286           |
|                              | Jonor        | 294           |
|                              | Kelantan     | 352           |



|               |        |        |
|---------------|--------|--------|
|               | Penang | 125    |
| <b>Mean</b>   |        | 179.71 |
| <b>Median</b> |        | 125.00 |

**Table S16 Emission factors for light and heavy truck transport (gC.km<sup>-1</sup>) used for pole transport.** Adapted from: Gencat [6].

|         |          |           |            | EMISSIONS g/km |         |        |         |         |         |
|---------|----------|-----------|------------|----------------|---------|--------|---------|---------|---------|
|         |          |           |            | 21K $\mu$ /H   |         | 69KM/H |         | 102KM/H |         |
| VEHICLE | FUEL     | TYPE      | WEIGHT (t) | CO2            | C (CO2) | CO2    | C (CO2) | CO2     | C (CO2) |
| LIGHT   | GASOLINA | -         | -          | 316.77         | 86.31   | 175.71 | 47.88   | 171.12  | 46.63   |
|         | DIÈSEL   | -         | -          | 281.42         | 76.68   | 186.21 | 50.74   | 225.69  | 61.50   |
| HEAVY   | DIÈSEL   | RÍGID     | <= 14      | 755.55         | 205.87  | 377.6  | 102.89  | 397.18  | 108.22  |
|         |          |           | > 14       | 1 561.72       | 425.54  | 458.7  | 124.99  | 452.12  | 123.19  |
|         |          | ARTICULAT | <= 34      | 1 422.68       | 387.65  | 535.61 | 145.94  | 505.16  | 137.65  |
|         |          |           | > 34       | 2 057.35       | 560.59  | 618.83 | 168.62  | 562.4   | 153.24  |
| Mean    |          |           |            | 167.45         |         |        |         |         |         |
| Median  |          |           |            | 124.09         |         |        |         |         |         |

13. Arifin R., & Mustafa N.M.S.N. A Working Plan for the Matang Mangrove Forest Reserve, Perak (6th revision). Malaysia: State Forestry Department. (2013)
14. Buhaug, Ø., Corbett, J. J., Endresen, O., Eyring, V., Faber, J., Hanayama, S., ... & Wanquing, W. Second IMO greenhouse gas study. *International Maritime Organization, London*. (2009)
15. McKinnon, A. C., & Piecyk, M. I. Measurement of CO<sub>2</sub> emissions from road freight transport: a review of UK experience. *Energy policy*, 37(10), 3733-3742. (2009)
